# Supplementary material for: A fluorescence anisotropy study of the DNA hybridization reaction mediated by formation of the C–Ag+–C structure
Source: Royal Society of Chemistry journal article supplement (doi:10.1039/c6ay00459h), 2016-01-01
Supplement: c6ay00459h1.pdf [file c6ay00459h1.pdf]

Supporting Information

**A Fluorescence Anisotropy Study of DNA Hybridization Reaction Mediated by  
Formation of C-Ag<sup>+</sup>-C Structure**

Xinying Hong<sup>a</sup>, Hongduan Huang<sup>a</sup>, Mingxing Chen<sup>b</sup>, Feng Liu<sup>a</sup>, Na Li<sup>\*a</sup>

<sup>a</sup>Beijing National Laboratory for Molecular Sciences (BNLMS), Key Laboratory of Bioorganic Chemistry and Molecular Engineering of Ministry of Education, Institute of Analytical Chemistry, and <sup>b</sup>Medium Instrument Lab, College of Chemistry and Molecular Engineering, Peking University, Beijing, 100871, China.

DNA sequences (from 5' to 3') used in this work are given in the following tables. DNA was named according to the dye, the strand length, the number of C-C mismatch between the ROX-labeled strand and the partially complementary strand, the usage of hairpin structure and the length of c-overhang. Specifically, L20ROX represents a 20-nt ROX-labeled ssDNA strand; H10L20M5 represents a hairpin-structured partially complementary strand with a 10-b.p. stem and a 20-nt loop and five C-C- mismatched sites to L20ROX. L15M3O6 represents a 15-nt linear partially complementary strand with three C-C mismatches to L15ROX and have a 6-nt c-overhang when hybridizing with L15ROX.

Effect of buffer and pH (Fig. 1)

| Name     | Sequence                                 |
|----------|------------------------------------------|
| L20ROX   | CACACCACACCACACCACAC                     |
| H10L20M5 | ATGCAATTAAGTCTCGTGTCGTCTGGTCTGTAAATTGCAT |

Effect of the C-C mismatch percentage (Fig. 2 & Fig. S1)

| Name   | Sequence              |
|--------|-----------------------|
| L10ROX | CACCACACCA            |
| L10M0  | TGGTGTGGTG            |
| L10M1  | TGGTCTGGTG            |
| L10M2  | TGCTGTCTGTG           |
| L12ROX | ACCACACCACAC          |
| L12M3  | GTCTGTCTGTCTGT        |
| L12M2  | GTCTGGTGTCTGT         |
| L12M1  | GTGTGTCTGTGGT         |
| L12M0  | GTGTGGTGTGGT          |
| L15ROX | CACCACACCACACCA       |
| L15M3  | TGCTGTGTCTGTGTCTG     |
| L15M2  | TGGTCTGGTGTCTGT       |
| L15M1  | TGGTGTGTCTGTGGTG      |
| L15M0  | TGGTGTGGTGTGGTG       |
| L20ROX | CACACCACACCACACCACAC  |
| L20M3  | GTCTGGTGTGGTCTGGTCTG  |
| L20M4  | GTCTGGTCTGGTCTGGTCTG  |
| L20M5  | GTCTCGTGTCTGTCTGGTCTG |
| L20M7  | GTCTCGTCTCGTCTCGTCTG  |
| L20M9  | CTCTCGTCTCGTCTCGTCTC  |

Effect of the length of the fluorescent DNA (Fig. 3)

| Name   | Sequence                  |
|--------|---------------------------|
| L15ROX | CACCACACCACACCA           |
| L15M3  | TGCTGTGTCTGTGTCTG         |
| L20ROX | CACACCACACCACACCACAC      |
| L20M4  | GTCTGGTCTGGTCTGGTCTG      |
| L25ROX | CACACCACACCACACCACACCACAC |

|        |                                |
|--------|--------------------------------|
| L25M5  | GTCTGGTCTGGTCTGGTCTGGTCTG      |
| L30ROX | CACACCACACCACACCACACCACACCACAC |
| L30M6  | GTCTGGTCTGGTCTGGTCTGGTCTGGTCTG |

---

Usage of hairpin structure (Fig. 4 & Fig. 5)

| Name     | Sequence                                           |
|----------|----------------------------------------------------|
| L20ROX   | CACACCACACCACACCACAC                               |
| L20M3    | GTCTGGTGTGGTCTGGTCTG                               |
| H8L20M3  | ATATAATTGTCTGGTGTGGTCTGGTCTGAATTATAT               |
| H10L20M3 | TACGTTAATTGTCTGGTGTGGTCTGGTCTGAATTAACGTA           |
| H12L20M3 | TTAACGTTAATTGTCTGGTGTGGTCTGGTCTGAATTAACGTTAA       |
| H14L20M3 | TTAAACGTTAATTGTCTGGTGTGGTCTGGTCTGAATTAACGTTAA<br>A |
| L20M4    | GTCTGGTCTGGTCTGGTCTG                               |
| H8L20M4  | ATATAATT GTCTGGTCTGGTCTGGTCTGAATTATAT              |
| H10L20M4 | TACGTTAATT GTCTGGTCTGGTCTGGTCTGAATTAACGTA          |
| L15ROX   | CACCACACCACACCA                                    |
| H10L15M0 | ATGCAATTAATGGTGTGGTGTGGTGTAAATTGCAT                |
| H10L15M1 | ATGCAATTAATGGTGTGCTGTGGTGTAAATTGCAT                |
| H10L15M2 | ATGCAATTAATGGTCTGGTGTGCTGTAAATTGCAT                |
| H10L15M3 | ATGCAATTAATGCTGTGCTGTGCTGTAAATTGCAT                |

---

Equilibrium constant of dsDNA formation (Fig. 6)

| Name    | Sequence              |
|---------|-----------------------|
| L15ROX  | CACCACACCACACCA       |
| L15M3O6 | TGCTGTGCTGTGCTGTAAATT |

---

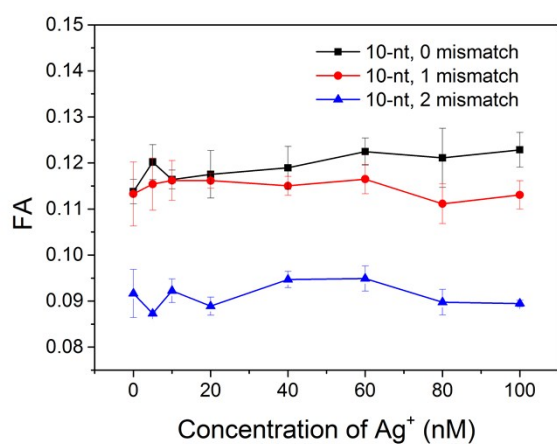

Fig. S1 The fluorescence anisotropy changes as a function of the silver ion concentration at varied number of C-C mismatches with the 10-nt fluorescent DNA.

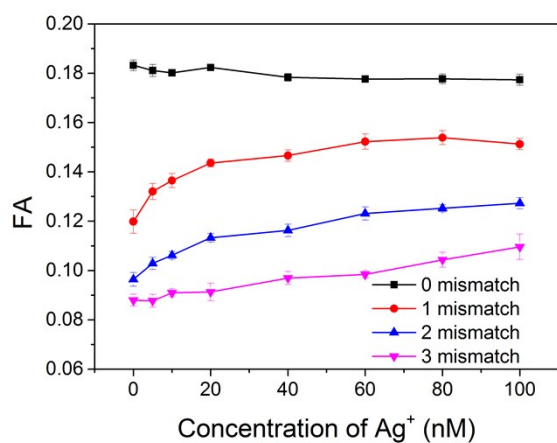

Fig. S2 Fluorescence anisotropy changes as a function of silver ion concentration at varied number of C-C mismatches when using a 15-nt fluorescent DNA and a partially complementary hairpin strand.

**The derivation of the Equation 5.**

According to the Scatchard model, binding of ligands to multiple sites follows Equation S1,

$$\bar{n} = \frac{n[Ligand]}{K_d + [Ligand]}$$

\\*  
MER  
GEFO  
RMA  
T (S1)

where  $\bar{n}$  is the average number of bound ligand,  $n$  is the total number of binding sites,  $[Ligand]$  is the concentration of unbound ligand and  $K_d$  is the dissociating constant. Since silver ion served as the ligand, Equation S1 could be rewritten into Equation S2,

$$\bar{n} = \frac{n[Ag^+]}{K_d + [Ag^+]}$$

\\*  
MER  
GEFO  
RMA  
T (S2)

where  $[Ag^+]$  is the concentration of the unbound silver ion. Then Equation S2 was reformulated into Equation S3,

$$[Ag^+] = \frac{\bar{n}K_d}{n - \bar{n}}$$

\\*  
MER  
GEFO  
RMA  
T (S3)

According to the mass balance, the concentration of the unbound silver ion can be expressed by Equation S4

$$[Ag^+] = c_{Ag^+} - \bar{n}\alpha c_{DNA}$$

\\*  
MER  
GEFO  
RMA  
T (S4)

where  $c_{Ag^+}$  and  $c_{DNA}$  is the total concentration of silver ion and the DNA strand. Therefore,

$$[Ag^+] = c_{Ag^+} - \bar{n}\alpha c_{DNA} = \frac{\bar{n}K_d}{n - \bar{n}}$$

\\*  
MER  
GEFO  
RMA  
T (S5)

Equation S5 could be then rewritten into Equation S6

$$\alpha = \frac{c_{Ag^+}}{c_{DNA}\bar{n}} + \frac{K_d}{c_{DNA}(\bar{n} - n)}$$

\\*  
MER  
GEFO  
RMA  
T (S6)

which is the Equation 5 in the article.

According to the sequence design and the experimental procedure,  $n$  was and  $c_{DNA}$  was 20 nM. Therefore, the equation used to fit the experimental data was

$$\alpha = \frac{c_{Ag^+}}{20\bar{n}} + \frac{K_d}{20(\bar{n} - 3)}$$

\\*  
MER  
GEFO  
RMA  
T (S7)
